# Supplementary material
Source: PubMed Central journal article supplement (PMC2268822)

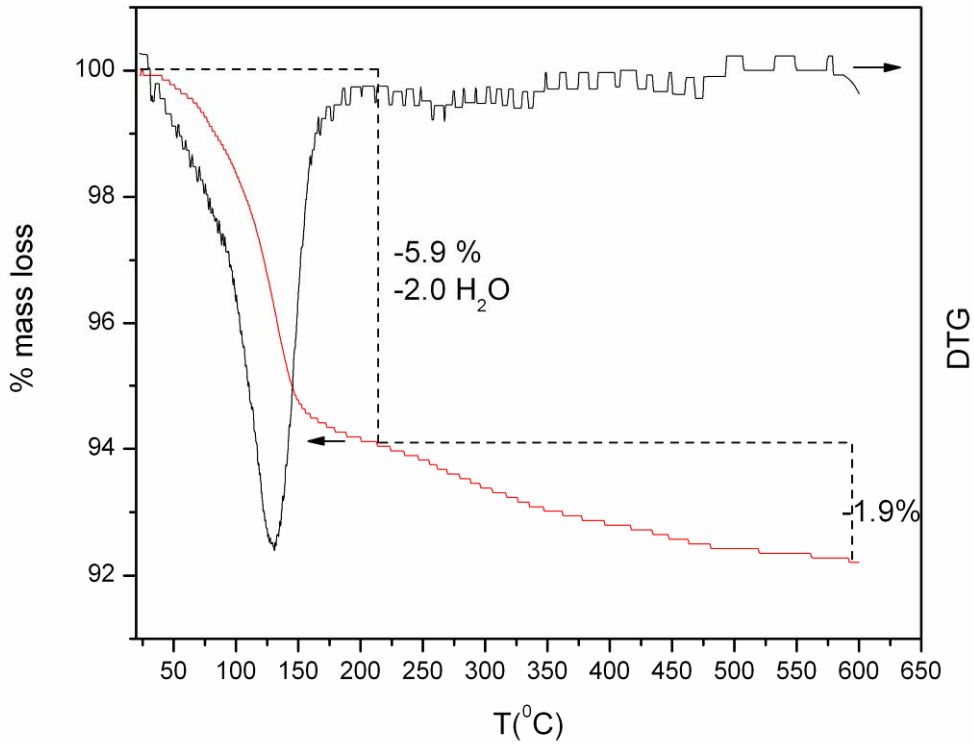

Supplement: pnas_0711528105_1.pdf [file pnas_0711528105_1.pdf]

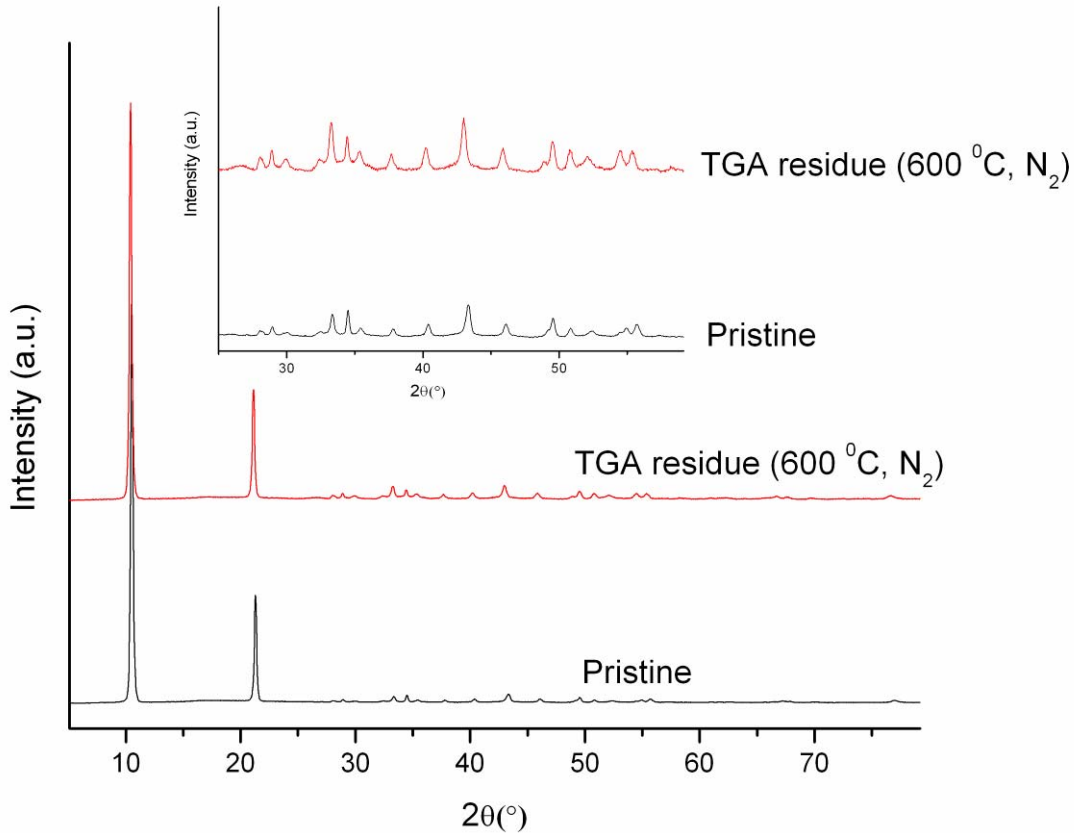

Supplement: pnas_0711528105_2.pdf [file pnas_0711528105_2.pdf]

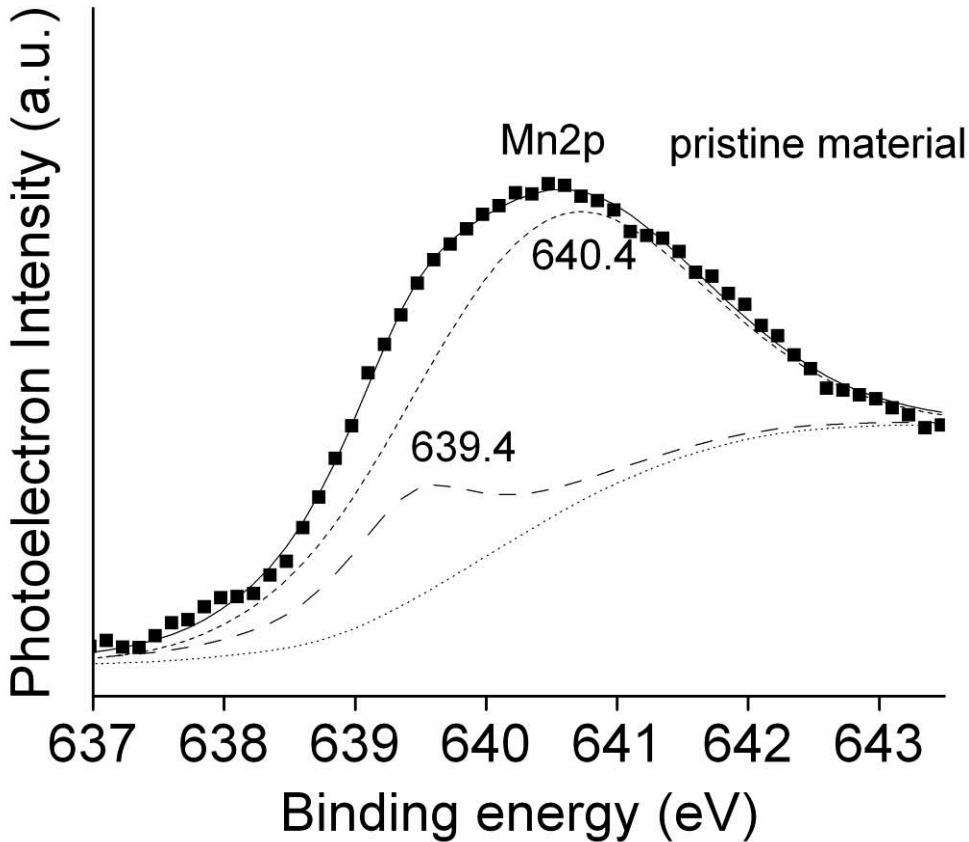

Supplement: pnas_0711528105_4.pdf [file pnas_0711528105_4.pdf]

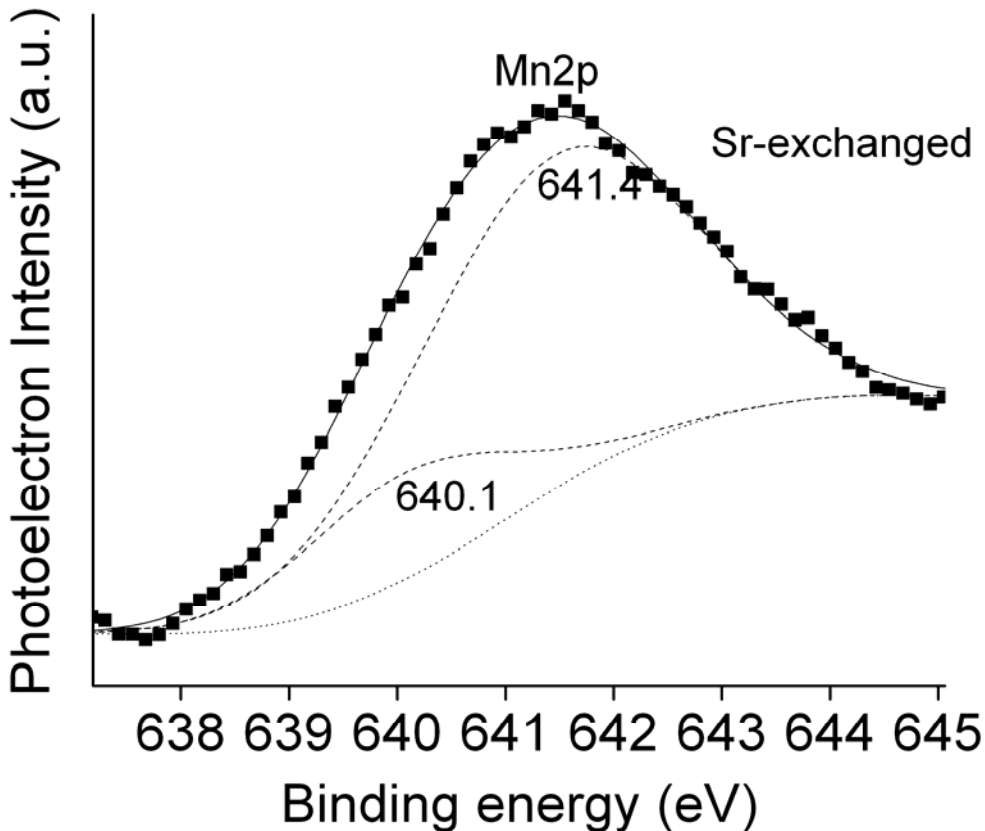

Supplement: pnas_0711528105_5.pdf [file pnas_0711528105_5.pdf]
